# Supplementary material for: Development of MVA-d34 Tetravalent Dengue Vaccine: Design and Immunogenicity
Source: MDPI journal article supplement (doi:10.3390/vaccines11040831), 2023-04-12
Supplement: s1 [file s1]

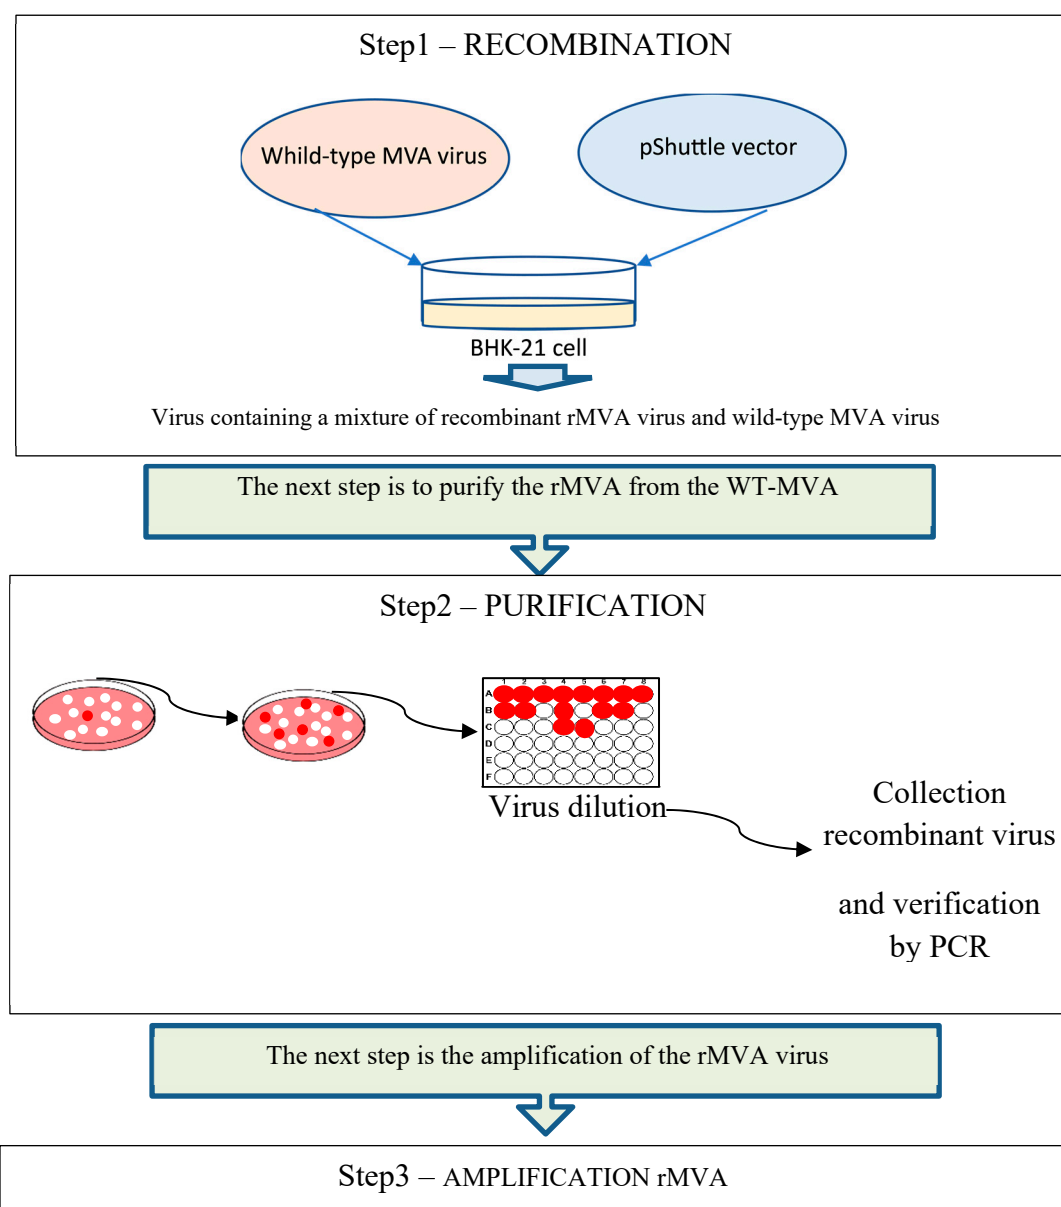

Figure S1. Scheme of the method used to generate rMVA. In Step 1, recombinant vaccinia virus was constructed through homologous recombination in BHK-21 cells that were first infected with wild-type MVA virus and then transfected with pShuttle vector. This resulted in a mixture of wild-type and recombinant MVA virus. In Step 2, individual colonies were isolated on a 6-well plate and the recombinant MVA virus was purified from the wild-type virus, followed by post-purification in a 48-well plate. Finally, in Step 3, the recombinant MVA virus was amplified in a T175 flask.

Table S1. Sequences of amino acid residues of the DIII domain from the four dengue virus serotypes used in this study.

|                                                                                                                                               |
|-----------------------------------------------------------------------------------------------------------------------------------------------|
| >NP_059433 DENV1_DIII (aa 578-676)<br>SYVMCTGSFKLEKEVAETQHGTVLVQVKYEGTDAPCKIPFSSQDEKGV TQNGRLITANPIVTDKEKPVNIEAEPFGE<br>SYIVVGAGEKALKLSWFKKGS |
| >NP_056776 DENV2_DIII (aa 578-676)<br>SYSMCTGKFKVVKEIAETQHGTIVIRVQYEGDGS PCKIPFEIMDLEKRHVLGRLITVNPIVTEKDSPVNIEAEPFGDSYI<br>IIGVEPGQLKLNWFKKGS |
| >YP_001621843 DENV3_DIII (aa 576-674)                                                                                                         |

SYAMCTNTFVLKKEVSETQHGTILIKVEYKGEDAPCKIPFSTEDGQGKAHNGRLITANPVVTKKEEPVNIEAEPPFGES  
NIVIGIGDNALKINWYKKGS

>NP\_073286 DENV4\_DIII (aa 577-675)

SYTMCSGKFSIDKEMAETQHGTTVVKVKEYGAGAPCKVPIERDVNKEKVVGRIISSTPLAENTNSVTNIELEPPFGDS  
YIVIGVGNLSALTLHWFRKGS

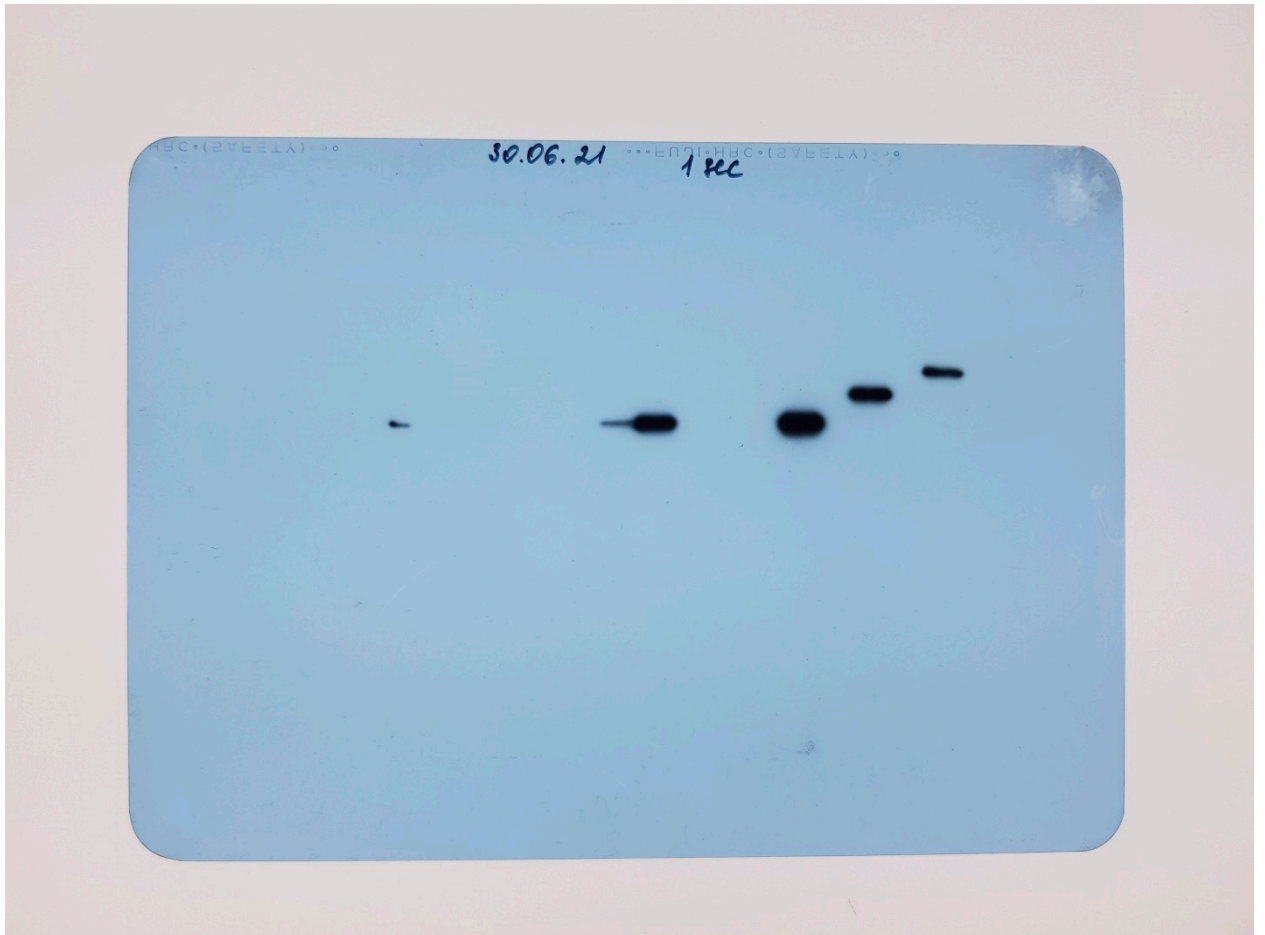

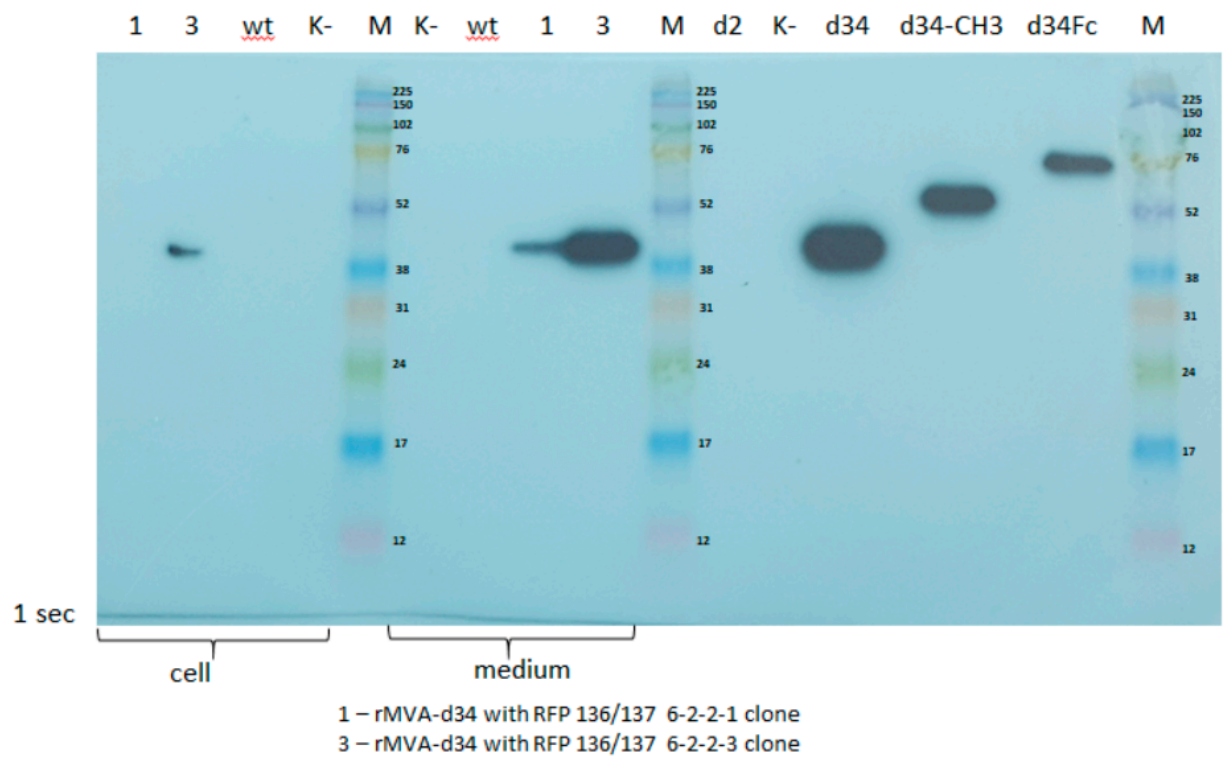

Figure S2. Film and membrane to Figure 2.

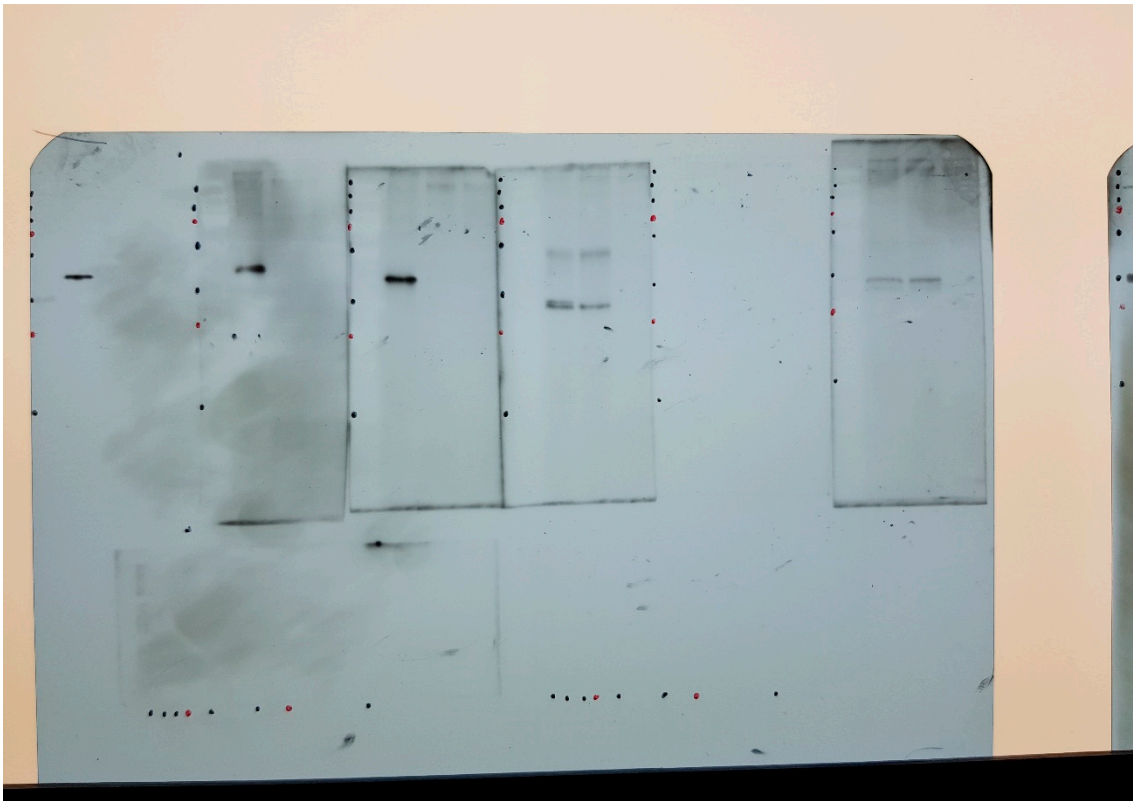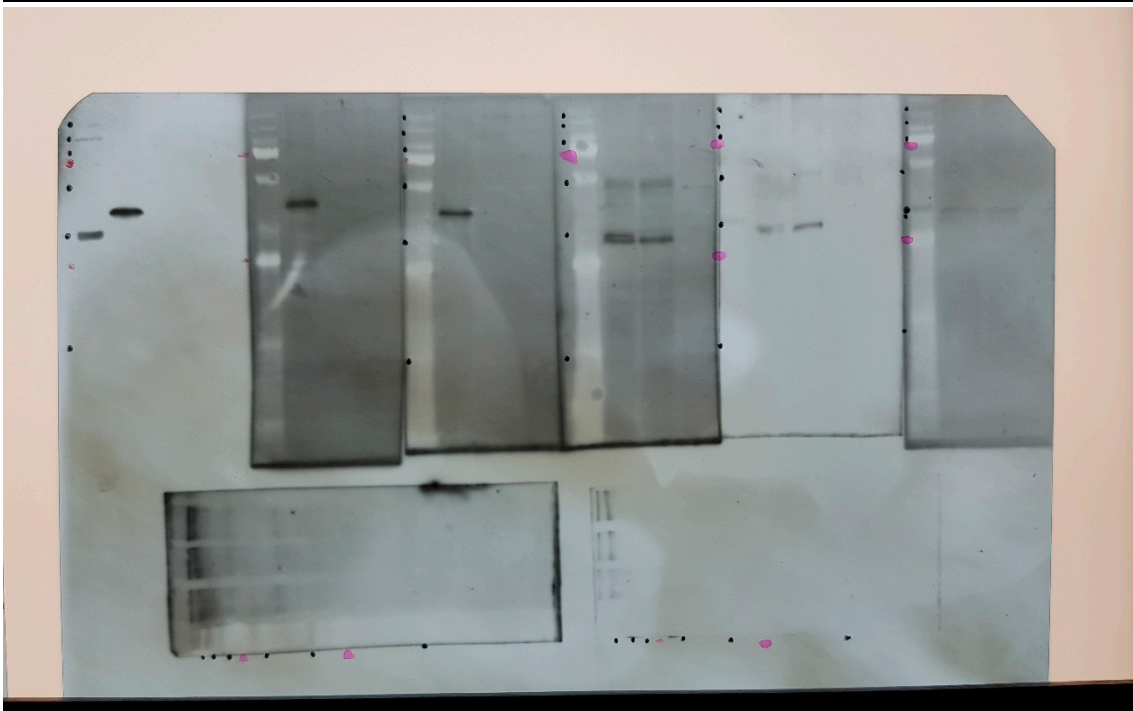

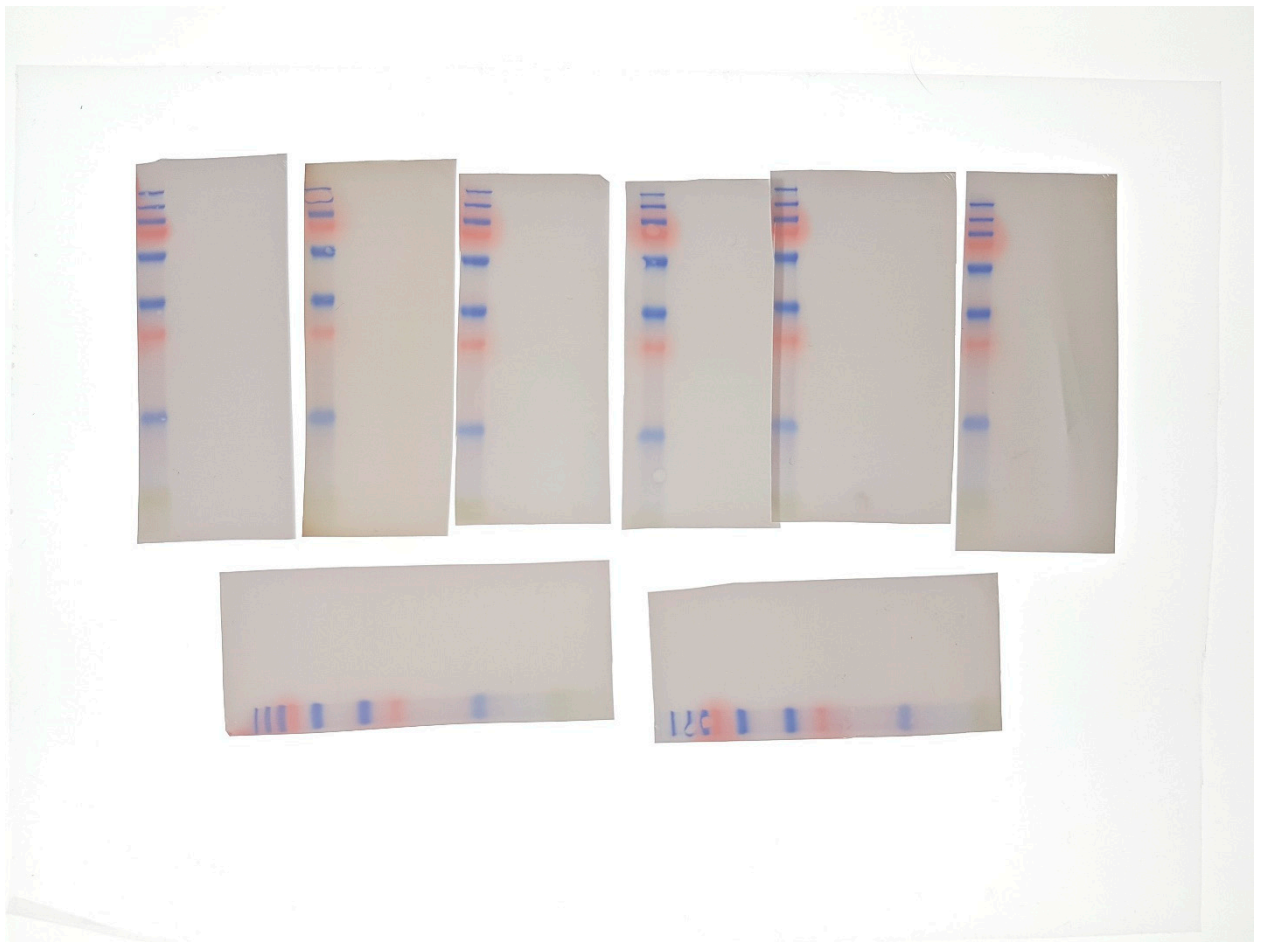

Figure S3. Film and membrane to Figure 3.
